# Supplementary material for: An improved algorithm for resolving overlapping peaks in ion mobility spectrometry and its application to the separation of glycan isomers
Source: Royal Society of Chemistry journal article supplement (doi:10.1039/d3an01042b), 2023-01-01
Supplement: d3an01042b1.pdf [file d3an01042b1.pdf]

## Electronic Supplementary Information

### **An improved algorithm for resolving overlapping peaks in ion mobility spectrometry and its application to the separation of glycan isomers**

Xiangyang Hu<sup>a,b</sup>, Junfei Zhou<sup>a,b</sup>, Junhui Li<sup>b,c</sup>, Wenqing Gao<sup>\*b,c</sup>, Jun Zhou<sup>\*d</sup>, Jiancheng Yu<sup>\*a,b,c</sup> and Keqi Tang<sup>b,c</sup>

- a. Faculty of Electrical Engineering and Computer Science, Ningbo University, Ningbo, P. R. China.*
- b. Zhejiang Engineering Research Center of Advanced Mass Spectrometry and Clinical Application, Institute of Mass Spectrometry, School of Materials Science and Chemical Engineering, Ningbo University, Ningbo, P. R. China.*
- c. Ningbo Zhenhai Institute of Mass Spectrometry, Ningbo, P.R. China.*
- d. Zhejiang Ningbo Ecological and Environmental Monitoring Center, Ningbo, P.R. China.*

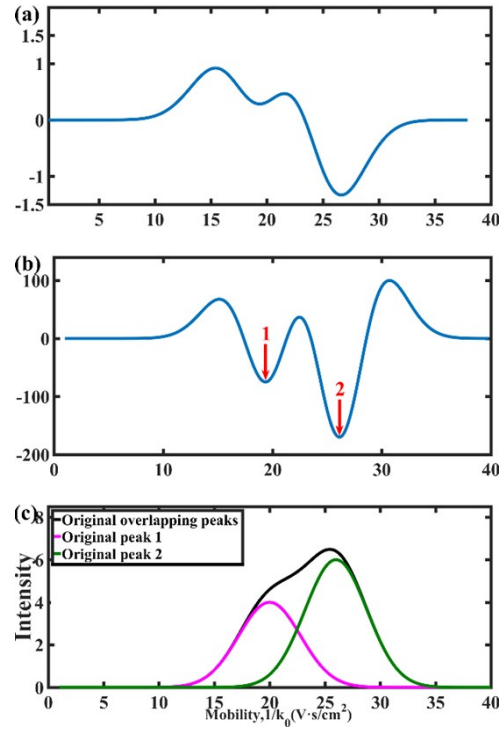

Fig.S1 The first-order differentiation (a) and the second-order differentiation (b) of the simulated overlapping peaks containing two types of components. (c) Overlapping peak an its single peak composition.

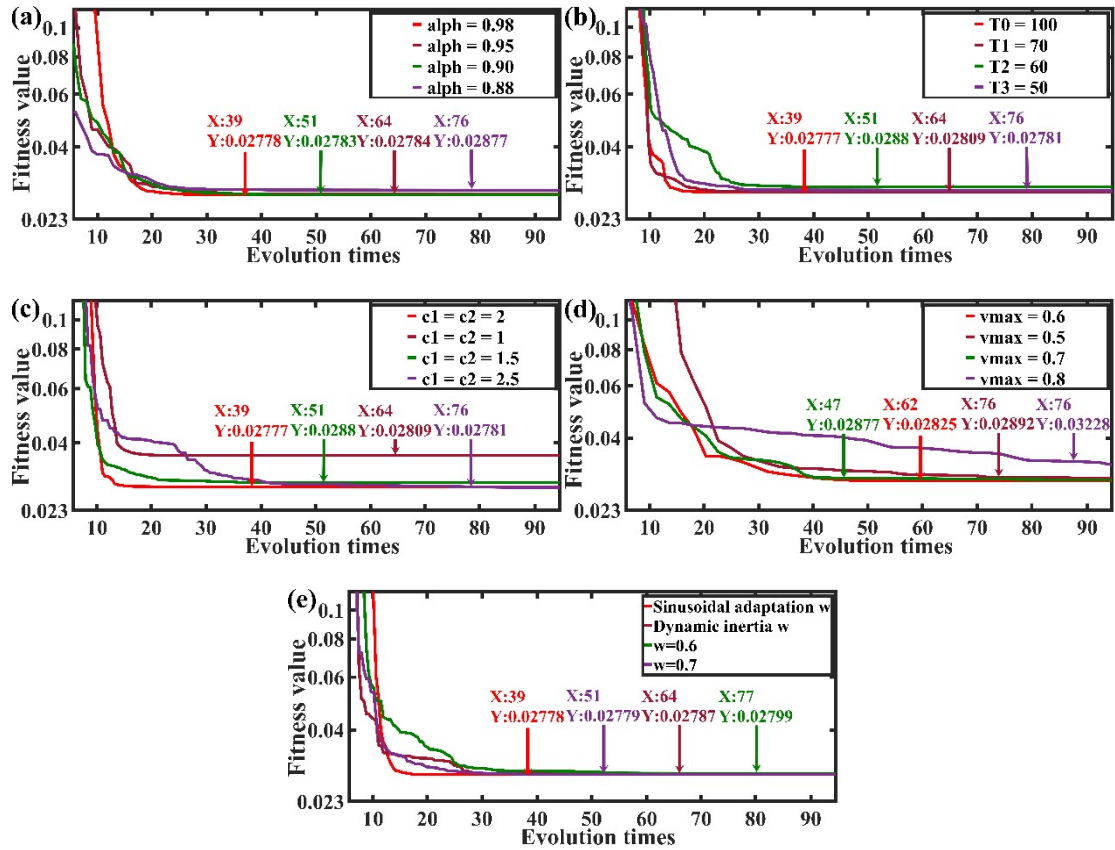

Fig.S2 The effect of different parameters (a). $\alpha$ , (b). $T$ , (c). $c_1$  and  $c_2$ , (d). $V_{max}$  and (e). $w$  on the DWSA-PSO algorithm.

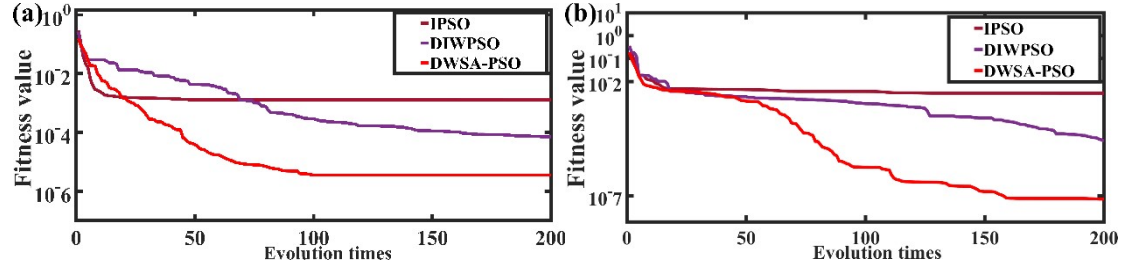

Fig.S3 The variation of fitness value with the number of evolution iterations when analyzing two types of overlapping peaks using three different methods.

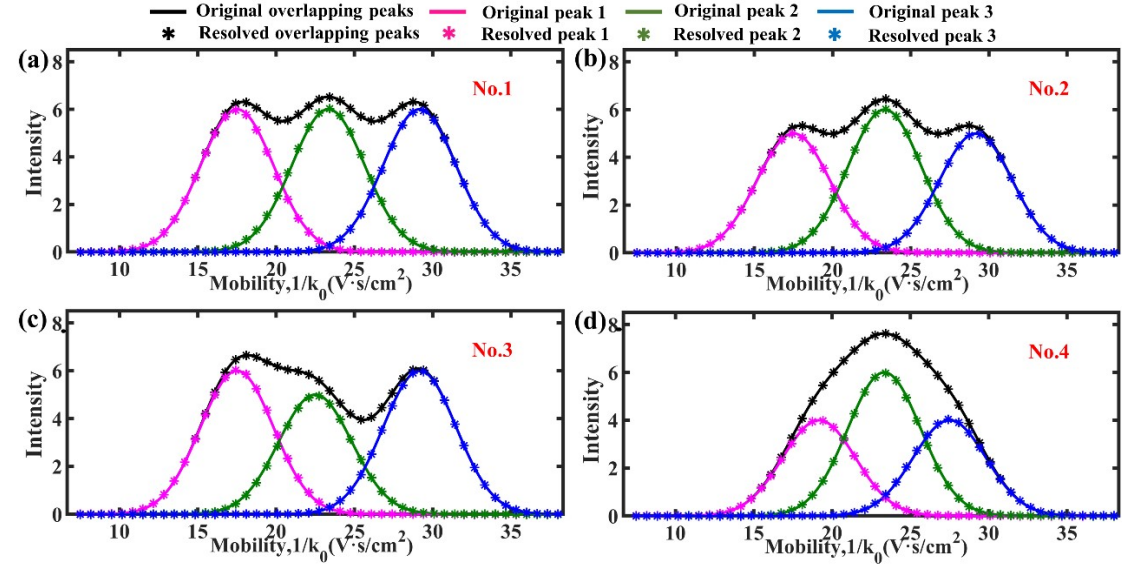

Fig.S4 Separation results of four types of simulated overlapping peaks with different degrees of overlap by using the DWSA-PSO method

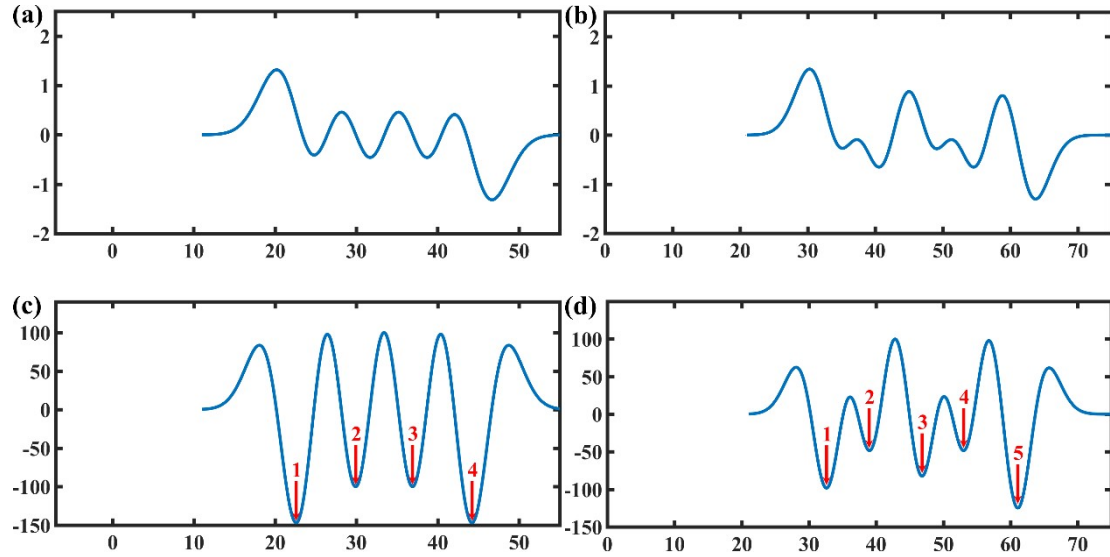

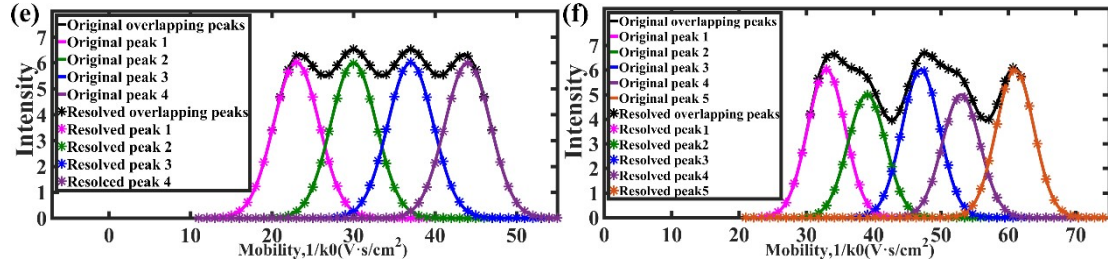

Fig.S5 Separation results of four- and five-component overlapping peaks by using DWSA-PSO: (a-b) The first-order differentiation; (c-d) The second-order differentiation; (e-f) Overlapping peak resolution contours.

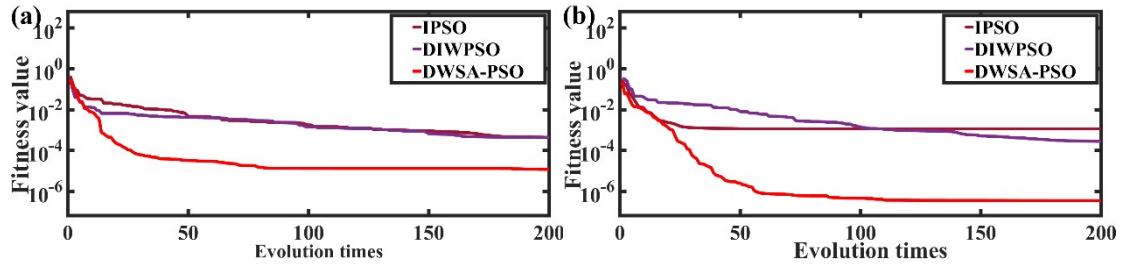

Fig.S6 The variation of fitness value with the number of evolution iterations graph obtained from the analysis of overlapping peaks of four-components (a) and five-components (b) using three different methods.

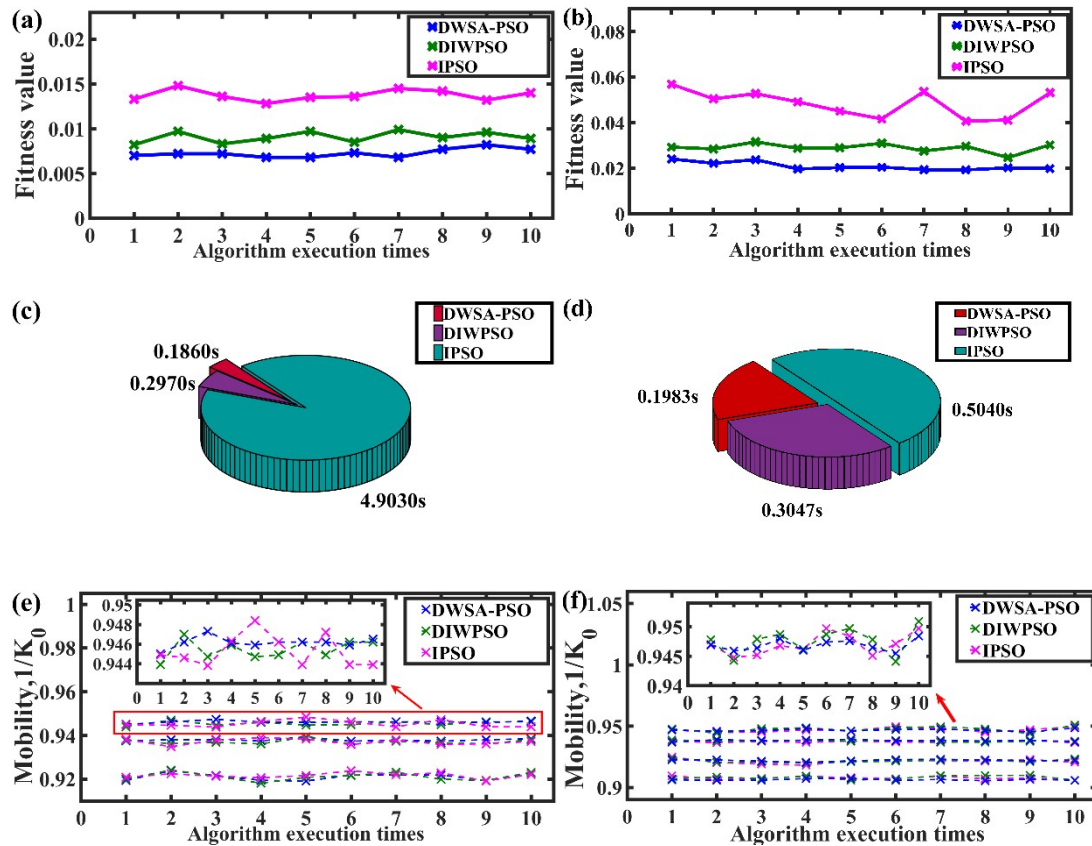

Fig.S7 Parameter values obtained by analyzing overlapping peaks containing three- and four- components 10 times using three methods (a-b) Fitness value; (c-d) Average time; (e-f) Mobility.

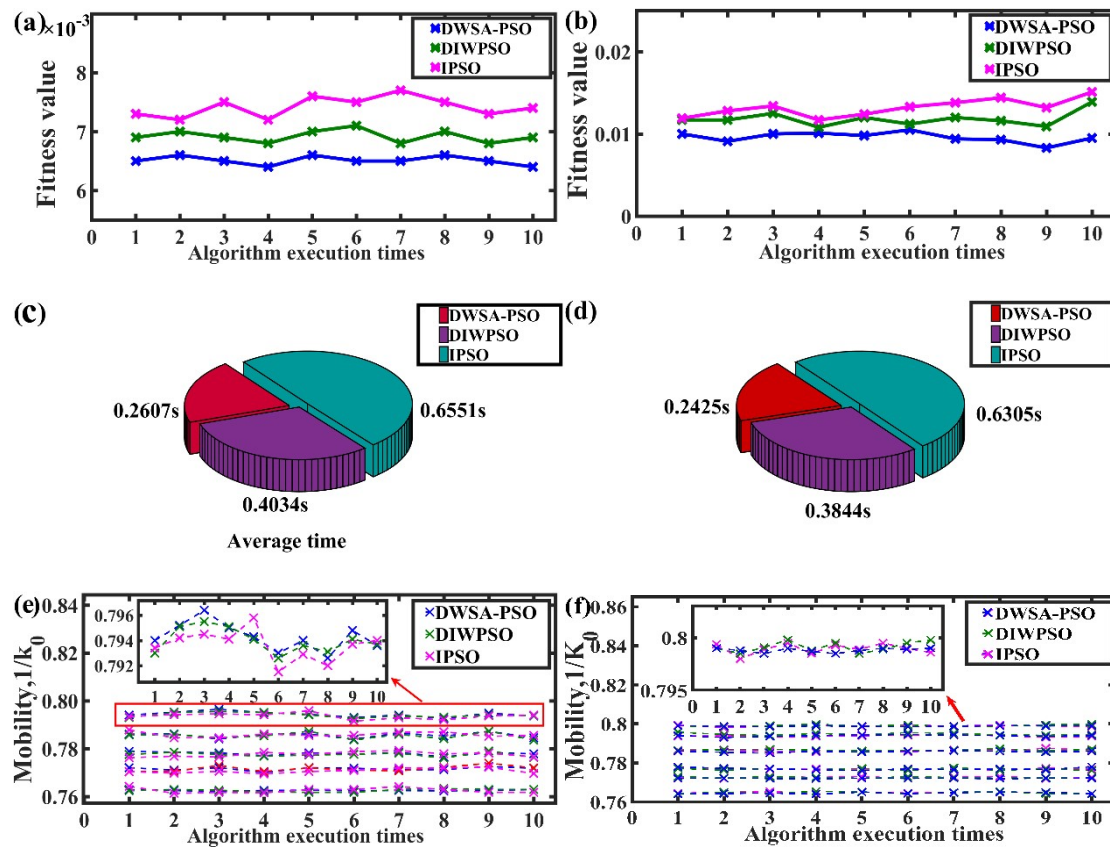

Fig.S8 Parameter values obtained by analyzing overlapping peaks containing five- and six- components 10 times using three methods: (a-b) Fitness value; (c-d) Average time; (e-f) Mobility.

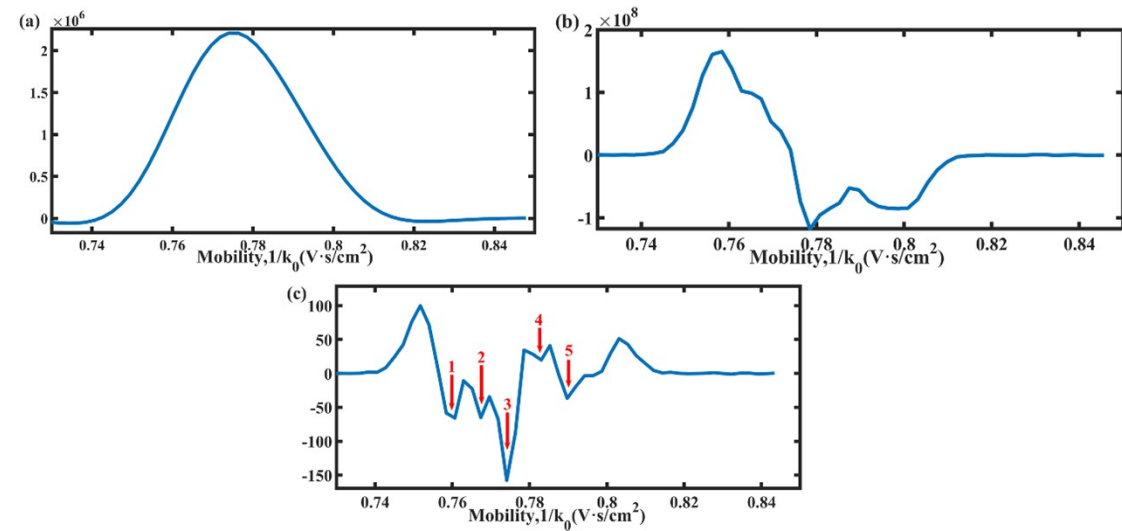

Fig.S9 (a) Original peak shape of the five-component ([SUC+TRE+MEL+LAC+MAL+CL]) overlapping peaks; (b) The first-order differentiation; (c) The second-order differentiation.

Table S1(a). Separation results of four simulated overlapping peaks with different overlap degree using DWSA-PSO

| No. | single peak | Error (100%) |          |        |
|-----|-------------|--------------|----------|--------|
|     |             | Intensity    | Position | FWHM   |
| 1   | 1           | 0.01         | 0.04     | 0.01   |
|     | 2           | -0.01        | -0.02    | 0.01   |
|     | 3           | -0.006       | -0.01    | 0.01   |
| 2   | 1           | 0.44         | 0.56     | 0.23   |
|     | 2           | -0.40        | -1.25    | -0.006 |
|     | 3           | 0.47         | 0.56     | -0.11  |
| 3   | 1           | 0.39         | 0.12     | 0.11   |
|     | 2           | -0.24        | -0.76    | 0.03   |
|     | 3           | 0.03         | 0.29     | -0.03  |
| 4   | 1           | -0.75        | -0.58    | -0.24  |
|     | 2           | -0.24        | -0.32    | -0.28  |
|     | 3           | 1.53         | 0.63     | -0.20  |

Abbreviations: No, the type of overlapping peaks; FWHM, full width at half maximum.

Table S1(b). Running times and Fitness value of four simulated overlapping peaks with different overlap degree using DWSA-PSO

| No. | Running time | Fitness value         |
|-----|--------------|-----------------------|
| 1   | 0.45         | $1.35 \times 10^{-7}$ |
| 2   | 0.45         | $1.03 \times 10^{-5}$ |
| 3   | 0.49         | $5.25 \times 10^{-6}$ |
| 4   | 0.44         | $2.62 \times 10^{-6}$ |

Abbreviations: No, the type of overlapping peaks

Table S2(a). Separation results of IPSO, DIWPSO and DWSA-PSO for simulated four- and five-overlapping peaks

| C. | Parameters | Error (%) |        |          |
|----|------------|-----------|--------|----------|
|    |            | IPSO      | DIWPSO | DWSA-PSO |
| 4  | I1         | -4.27     | 2.41   | -0.37    |
|    | I2         | 3.64      | -8.07  | -0.05    |
|    | I3         | -6.55     | 3.79   | -0.26    |
|    | I4         | 2.11      | -5.09  | -0.11    |
|    | P1         | -1.46     | 1.20   | -0.11    |
|    | P2         | 0.81      | -0.93  | -0.02    |
|    | P3         | 0.87      | -0.49  | 0.05     |
|    | P4         | -0.28     | 0.66   | 0.02     |
|    | W1         | -2.83     | 3.05   | -0.10    |
|    | W2         | 0.14      | -10.62 | 0.80     |
|    | W3         | -9.32     | 16.29  | 0.15     |
|    | W4         | 1.41      | -3.46  | -0.09    |
| 5  | I1         | -18.17    | 5.84   | -0.28    |
|    | I2         | 8.08      | -7.00  | 0.28     |
|    | I3         | -1.13     | 1.66   | -0.33    |
|    | I4         | -3.00     | -3.20  | 0.37     |
|    | I5         | -0.12     | -0.22  | -0.02    |
|    | P1         | -4.00     | 2.20   | -0.09    |
|    | P2         | -3.22     | 1.13   | -0.03    |
|    | P3         | 1.10      | -0.09  | -0.03    |

|    |       |        |        |
|----|-------|--------|--------|
| P4 | 0.40  | 0.27   | -0.04  |
| P5 | -0.02 | 0.0002 | -0.004 |
| W1 | -6.87 | 4.57   | -0.18  |
| W2 | 25.24 | -10.59 | 0.52   |
| W3 | -0.65 | 5.07   | -0.45  |
| W4 | -2.70 | -0.63  | 0.36   |
| W5 | 0.58  | 0.09   | -0.03  |

Abbreviations: C, the number of overlapping peak components; I, Intensity; P, Position; W, full width at half maximum.

Table S2(b). Running times and Fitness value of IPSO, DIWPSO and DWSA-PSO for simulated four- and five-overlapping peaks

| C. | Running time (s) |        |          | Fitness value         |                       |                       |
|----|------------------|--------|----------|-----------------------|-----------------------|-----------------------|
|    | IPSO             | DIWPSO | DWSA-PSO | IPSO                  | DIWPSO                | DWSA-PSO              |
| 4  | 2.97             | 1.94   | 1.24     | $4.29 \times 10^{-4}$ | $4.29 \times 10^{-4}$ | $1.16 \times 10^{-5}$ |
| 5  | 3.18             | 2.06   | 2.03     | $1.13 \times 10^{-3}$ | $2.74 \times 10^{-4}$ | $3.46 \times 10^{-7}$ |

Abbreviations: C, the number of overlapping peak components

Table S3. Mobility, FWHM, and CCS of  $[M+Cl]^-$  complexes

| Glycan isomers | Ion species    | Mobility ( $V s/cm^2$ ) | FWHM  | CCS   |
|----------------|----------------|-------------------------|-------|-------|
| Sucrose        | $[SUC+Cl]^-$   | 0.764                   | 0.015 | 158.5 |
| Trehalose      | $[TRE+Cl]^-$   | 0.772                   | 0.014 | 160.2 |
| Lactose        | $[LAC+Cl]^-$   | 0.786                   | 0.016 | 163.1 |
| Melibiose      | $[MEL+Cl]^-$   | 0.778                   | 0.015 | 161.4 |
| Maltose        | $[MAL+Cl]^-$   | 0.794                   | 0.015 | 164.7 |
| Cellobiose     | $[CEL+Cl]^-$   | 0.799                   | 0.016 | 165.8 |
| Maltotriose    | $[MAL-3+Cl]^-$ | 0.946                   | 0.018 | 194.2 |
| Raffinose      | $[RAF-3+Cl]^-$ | 0.922                   | 0.015 | 189.3 |
| Isomaltotriose | $[ISO-3+Cl]^-$ | 0.938                   | 0.017 | 192.6 |
| Melezitose     | $[MEL-3+Cl]^-$ | 0.905                   | 0.016 | 185.9 |
